# Supplementary material for: Modelling intramuscular drug fate in vitro with tissue-relevant biomimetic hydrogels
Source: PubMed Central journal article supplement — Int J Pharm X. 2022 Aug 13;4:100125. doi: 10.1016/j.ijpx.2022.100125 (PMC9440386; doi:10.1016/j.ijpx.2022.100125), 2022-08-13
Supplement: mmc1.pdf [file mmc1.pdf]

**Supplementary data for article:****“Modelling intramuscular drug fate *in vitro* with skeletal muscle biomimetic hydrogels”****McCartan *et al.*, 2022.****GFP amino acid sequences**Calculated MW and pI determined with: [https://web.expasy.org/compute\\_pi/](https://web.expasy.org/compute_pi/)

&gt;-30 GFP

MGHHHHHHGG ASKGEELFDG VVPILVELDG DVNGHEFSVR GEGEGDATEG ELTLKFICTT  
 GELPVPWPTL VTTLTYGVQC FSDYPDHMDQ HDFFKSAMPE GYVQERTISF KDDGTYKTRA  
 EVKFEGDTLV NRIELKGIDF KEDGNILGHK LEYNFNSHDV YITADKQENG IKAEFEIRHN  
 VEDGSVQLAD HYQQNTPIGD GPVLLPDDHY LSTESALSKD PNEDRDHMLV LEFVTAAGID  
 HGMDELYK

Calculated molecular weight: 27.79 kDa

pI: 4.64

&gt;+36 GFP

MGHHHHHHGG ASKGERLFRG KVPILVELKG DVNGHKFSVR GKGKGDATRG KLTLKFICTT  
 GKLPVPWPTL VTTLTYGVQC FSRYPKHMKR HDFFKSAMPK GYVQERTISF KKDGYKTRA  
 EVKFEGRTLTV NRIKLKGRDF KEKGNILGHK LRYNFNSHKV YITADKRKNG IKAKFKIRHN  
 VKDGSVQLAD HYQQNTPIGR GPVLLPRNHY LSTRSKLSKD PKEKRDHMLV LEFVTAAGIK  
 HGRDERYK

Calculate molecular weight: 28.49 kDa

pI: 10.42

&gt;std GFP

MGHHHHHHGG ASKGEELFTG VVPILVELDG DVNGHKFSVR GKGKGDATNG KLTLKFICTT  
 GKLPVPWPTL VTTLTYGVQC FSRYPDHMKQ HDFFKSAMPE GYVQERTISF KDDGTYKTRA  
 EVKFEGDTLV NRIELKGIDF KEDGNILGHK LEYNFNSHNV YITADKQKNG IKANFKIRHN  
 VEDGSVQLAD HYQQNTPIGD GPVLLPDNHY LSTQSALSKD PNEKRDHMLV LEFVTAAGIT  
 HGMDELYK

Calculated molecular weight: 27.79 kDa

pI: 6.59

### BLASTp analysis of human vs. bovine Col1 alpha chains

Sequences taken from: <https://www.uniprot.org/>

Human Col1a1 <https://www.uniprot.org/uniprot/P02452>

Human Col1a2 <https://www.uniprot.org/uniprot/P08123>

Bovine Col1a1 <https://www.uniprot.org/uniprot/P02453>

Bovine Col1a2 <https://www.uniprot.org/uniprot/P02465>

BLASTp (protein BLAST) conducted with:

[https://blast.ncbi.nlm.nih.gov/Blast.cgi?PROGRAM=blastp&PAGE\\_TYPE=BlastSearch&LINK\\_LOC=blasthome](https://blast.ncbi.nlm.nih.gov/Blast.cgi?PROGRAM=blastp&PAGE_TYPE=BlastSearch&LINK_LOC=blasthome)

**Table 1.** UniProt accession numbers of Col1 alpha chains used for BLASTp analysis

|        | Human  | Bovine |
|--------|--------|--------|
| Col1A1 | P02452 | P02453 |
| Col1A2 | P08123 | P02465 |

**Table 2.** Percentage amino acid sequence homology of bovine *versus* human Col1 alpha chains

|        | Amino acid sequence homology to human (%) |
|--------|-------------------------------------------|
| Col1A1 | 97.40                                     |
| Col1A2 | 92.39                                     |
